# Supplementary material for: LTBSG1, a New Allele of BRD2, Regulates Panicle and Grain Development in Rice by Brassinosteroid Biosynthetic Pathway
Source: PubMed Central journal article supplement (PMC6027417; doi:10.3390/genes9060292), 2018-06-11
Supplement: genes-09-00292-s001.pdf [file genes-09-00292-s001.pdf]

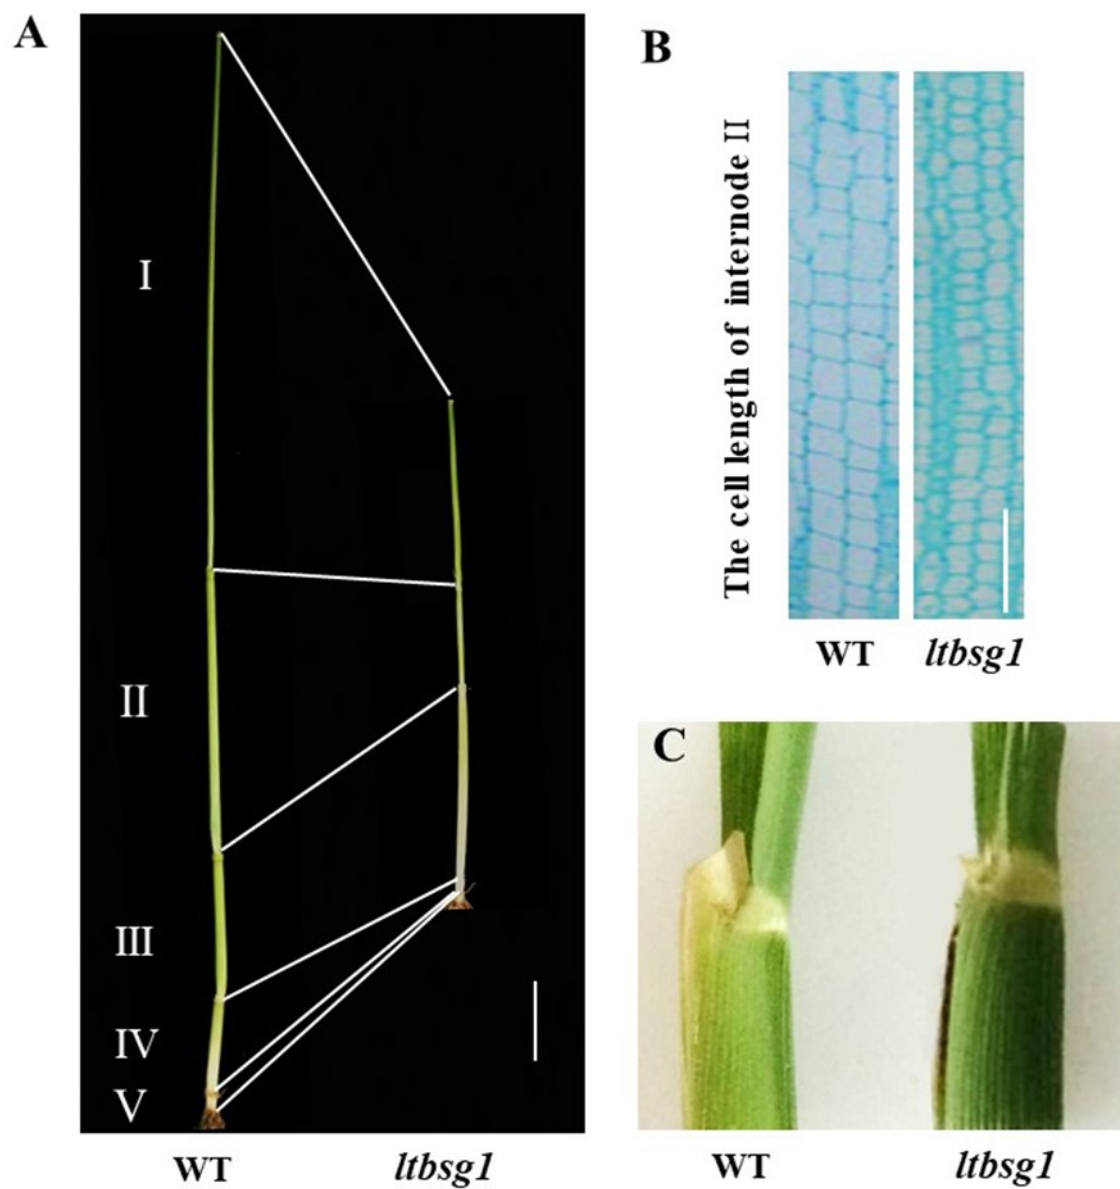

Figure S1. Analysis of internode pattern and lamina joints of WT and *ltbsg1*. (A) The internode pattern of WT and *ltbsg1*. Bar = 5 cm. (B) Longitudinal sections of the internode II in WT and *ltbsg1*. Bar = 100 μm. (C) The lamina joints of WT and *ltbsg1*.

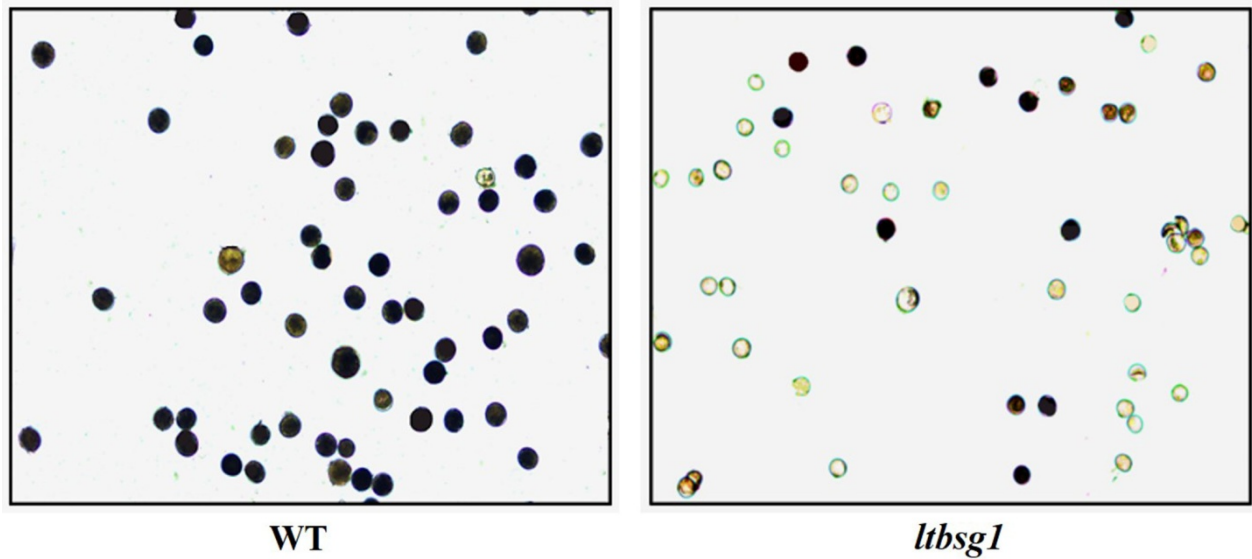

Figure S2. The detection of pollen vitality between WT and *ltbsg1*.

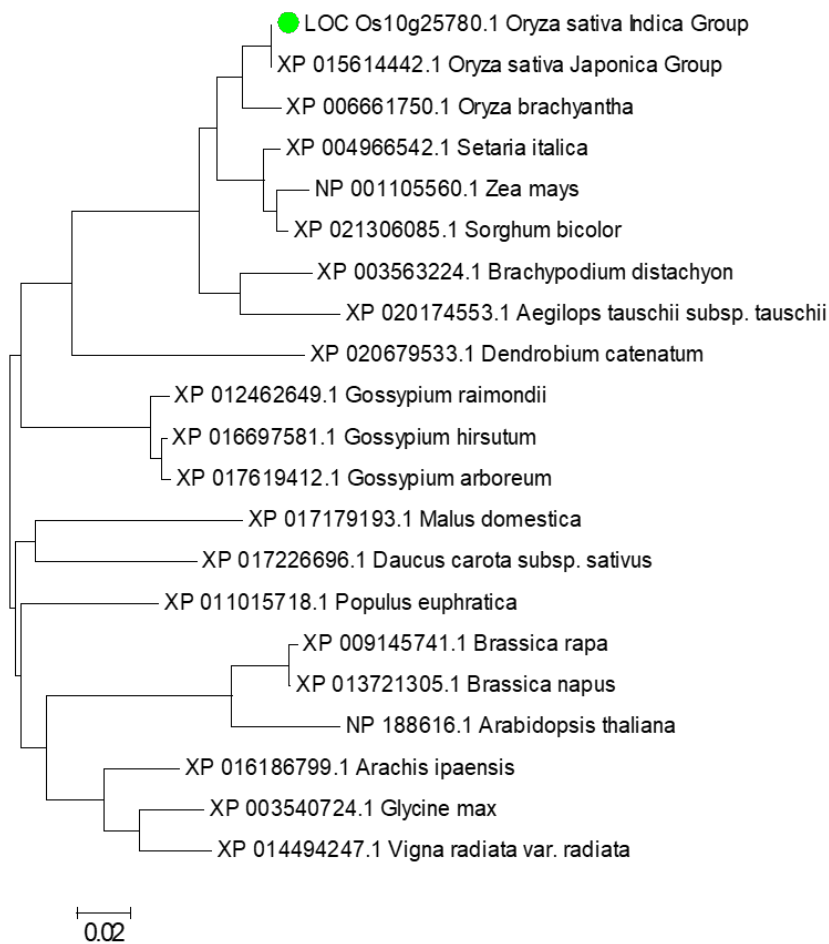

Figure S3. Phylogenetic tree of LTBSG1 with 20 homologous proteins in different plants. All the protein sequences were downloaded from the database of NCBI. The phylogenetic tree was constructed by MEGA5.10 program with the neighbor-joining method by 1,000 bootstrap replicates.

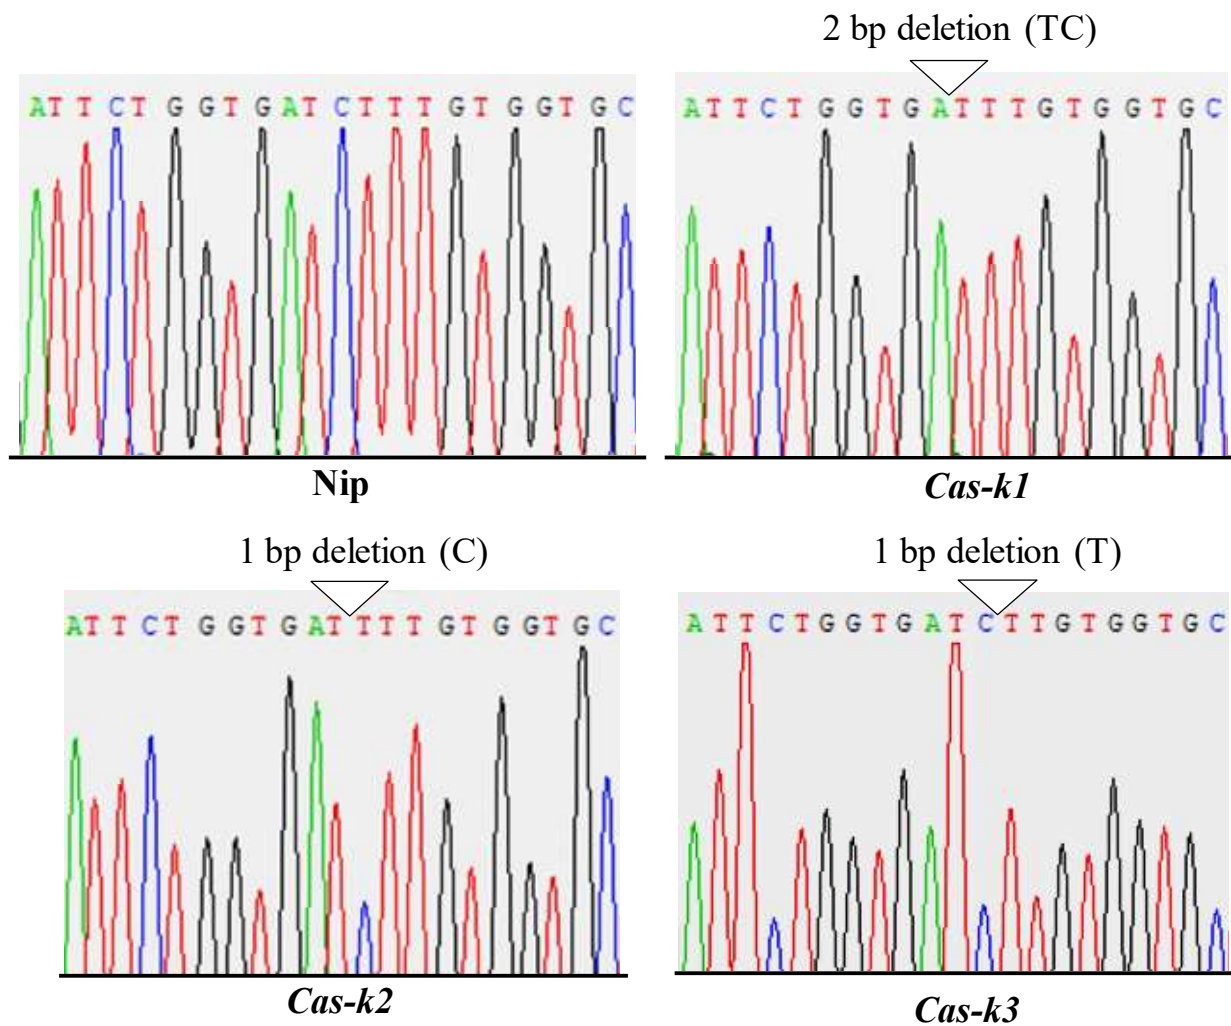

Figure S4. The confirmation of mutation sites of LTBSG1 knock-out lines by sequencing. The nucleotide deletions in Cas-k1, Cas-k2 and Cas-k3 were occurred in 173 th bp, 174 th bp and 175th bp, respectively.

Table S1. Primer list of this study.

(A) Primers for gene mapping

| Marker | Forward primer (5'→3')   | Reverse primer (5'→3')    |
|--------|--------------------------|---------------------------|
| RM596  | ATCTACACGGACGAATTGCC     | AGAAGCTTCAGCCTCTGCAG      |
| z10-4  | AACGTACACTCACTTCCCTATTG  | CTTCGAGATCTGGCTTTGTTTT    |
| z10-5  | AAGGATTCTGTGCAAGTTAGTTTT | AGAGAGGAAGCGGAGGAGAAT     |
| z10-7  | TGCAAATAATCCCAATCATAACTC | TTGCTAATGGATATGTGCTACCC   |
| z10-9  | AAGGCCATTATTTAAGCATCGTA  | TAGGGTCCATCACATAATAAAT    |
| z10-10 | GGTCTGATCGCCGCTTAGT      | TTGTTGGTTTTGTTTCAGATTAG   |
| z10-11 | GGCGCCGATTGGAGGTA        | TTGTTTGCTGGTAGTTCCTCGTTCA |
| z10-12 | GTTTCTATGGACCCGATACTGC   | ACGAGCTTACCGCTGCTTT       |

## (B) Primers for vector construction

| Purpose                     | Forward primer (5'→3')                             | Reverse primer (5'→3')                                   |
|-----------------------------|----------------------------------------------------|----------------------------------------------------------|
| Knock-out<br>by CRISPR/Cas9 | tgccgGTTGAGCCTCTTGTCAACATgt<br>ttagagctagaat       | AAAACATGTTGACAAGAGGCTCAACgg<br>cagccaagccagca            |
| GUS assay                   | CCATGATTACgaattcATGGCGAAAG<br>GAGTGGGTGAC          | CTCAGATCTAccatggCTCCGCTGTATTGA<br>CACAGTTACA             |
| Subcellular<br>localization | CGGGGGACGAGCTCggtaccATGGT<br>AAAATGGAAGTGTGATGGATG | CAGTGAAAAGTTCTTCTCCTTTACTCAT<br>tctagaCGCCTCATCAGCGTAGGC |

## (C) Primers for qRT-PCR

| Gene                          | Forward primer (5'→3')    | Reverse primer (5'→3')    |
|-------------------------------|---------------------------|---------------------------|
| <i>OsActin</i>                | GTGGTCGCCCTCTCTGAAAG      | GGCTTAGCATTCTTGGGTCCG     |
| <i>LTBSG1</i><br><i>/BRD2</i> | AATCATAGCCGGACTGCAGCCAT   | GCAGACCAGACATCGCCCAAATA   |
| <i>LP</i>                     | GACAGTGAGGATAGGAGCCG      | CGCCATCCAATCAATAGTTC      |
| <i>DEP1</i>                   | TCAACATCTTCAAATGCTCCTGC   | ATGGGTACGACACCGTGGG       |
| <i>FZP</i>                    | CACATTGGCTCGTACGGTCA      | AAGAGGAAGTCGTGGCCGT       |
| <i>LAX2</i>                   | CCGACGACGACCACCACGGATT    | TGGCGAGGCGGAGCCAGTCCCTG   |
| <i>TAW1</i>                   | GCTGGAGAAGACGAAGAAAGATAG  | CATTCCCCCTCCTCCTCC        |
| <i>GW2</i>                    | CAGCAGCGCATTCCCAGTTTTT    | GTGGTCAGCCGAGCACTCTC      |
| <i>qGW8</i>                   | AGGAGTTTGTATGAGGCCAAG     | GCGTGTAGTATGGGCTCTCC      |
| <i>GL3.1</i>                  | TCACAACCTCCAGGATAGG       | TTTGTCTCGCTCGTCTAT        |
| <i>GS5</i>                    | TTTGGCTGAGTATGCCTGGAG     | ATTTGCGAAGAATGCACGAT      |
| <i>qSW5</i>                   | GGGAGGGAGCAAGCGGAGGA      | CTCGCCAAGTTGCCGGCTGC      |
| <i>SMG1</i>                   | GTCATGATGAATTCCGATGGG     | ACTCCTAGATCCCACGTCTCAA    |
| <i>TGW6</i>                   | ACAGCCACAACGAGAATGTTCAAGA | TGTACGTGTAGGTGCTCCAGCCA   |
| <i>BRI1</i>                   | CAGCTACTTGGCTATCTTGAA     | CCATTCTTGTTGAAGGTGTACT    |
| <i>BU1</i>                    | GTAGCCAGCTTGATCTCATCTC    | GGGACGACTCTACTGCATCA      |
| <i>DLT</i>                    | TCAATCCATTGCAGGGACGAT     | ACGGCGACTTGCTGTACTCC      |
| <i>BAK1</i>                   | CACCCACAGAAAGGTTGCTT      | CATCATTGGCTAGACGAGCA      |
| <i>GSK2</i>                   | TCGGTATCGTCTTTCAGGCTA     | AAGCCCCCTAAATAACTGATACA   |
| <i>MDP1</i>                   | TTATTGACCGGTACAACCTCGCA   | TCCAGTCCATCGATCTCATCC     |
| <i>BZR1</i>                   | CCATCGCCGCCAAGATCTTCA     | TGCCATCGCCGCCAAGATCTT     |
| <i>BSK3</i>                   | CTACAGTACCAATCTGGCGTTTA   | CAGGCATCTTGAAGCTAATCG     |
| <i>BLE2</i>                   | GCTAGTTAGCTTACATGATGGC    | GCGGGTGAACATCCTCGT        |
| <i>BRD1</i>                   | GAGAAGAACATGGAATCACATCC   | TCAGTAATCTTGAACGCGGATAT   |
| <i>BRD2</i>                   | AATCATAGCCGGACTGCAGCCAT   | GCAGACCAGACATCGCCCAAATA   |
| <i>D2</i>                     | ATGTGATAACAGAGACGCTGCGGT  | TGGTGACCAAGTGGTGAAGGAAGA  |
| <i>D11</i>                    | AGTGAAGAGGGAGCATGAAGGCAT  | ATCTGCAGGGCTGAAAATTGTTGGG |
| <i>CPD1</i>                   | TCTTCTCCATCCCCTTCTCT      | CACCCCTCCGCCTCAAGA        |

Table S2. Predicated function analysis of candidate genes of *ltbsg1*

| Accession number | Gene function annotation                                              |
|------------------|-----------------------------------------------------------------------|
| LOC_Os10g25740   | Cellulose synthase, putative, expressed                               |
| LOC_Os10g25750   | Transposon protein, putative, CACTA, En/Spm sub-class                 |
| LOC_Os10g25760   | Transposon protein, putative, CACTA, En/Spm sub-class, expressed      |
| LOC_Os10g25770   | Transcription initiation factor IIE subunit beta, putative, expressed |
| LOC_Os10g25780   | FAD-linked oxidoreductase protein, putative, expressed                |
| LOC_Os10g25800   | Expressed protein                                                     |
| LOC_Os10g25810   | Expressed protein                                                     |
| LOC_Os10g25830   | Mitochondrial carrier protein, putative, expressed                    |
| LOC_Os10g25850   | Nuclear transcription factor Y subunit, putative, expressed           |
| LOC_Os10g25870   | Dirigent, putative, expressed                                         |
| LOC_Os10g25880   | Retrotransposon protein, putative, unclassified, expressed            |
| LOC_Os10g25890   | Retrotransposon protein, putative, unclassified, expressed            |
| LOC_Os10g25900   | Dirigent, putative, expressed                                         |

Table S3. Agronomic traits of Nip and three knock-out lines

| Traits                              | Nip          | <i>Cas-k1</i>  | <i>Cas-k2</i>  | <i>Cas-k3</i>  |
|-------------------------------------|--------------|----------------|----------------|----------------|
| Plant height (cm)                   | 76.38 ± 2.85 | 31.55 ± 2.07** | 30.44 ± 2.86** | 32.74 ± 3.15** |
| Top branch length (cm) <sup>1</sup> | 3.34 ± 0.31  | 4.46 ± 0.19**  | 4.09 ± 0.98**  | 5.22 ± 1.04**  |
| Grain length (mm)                   | 6.03 ± 0.05  | 4.41 ± 0.02**  | 4.43 ± 0.03**  | 4.36 ± 0.03**  |
| Grain width (mm)                    | 3.10 ± 0.01  | 2.14 ± 0.01**  | 2.10 ± 0.01**  | 2.24 ± 0.02**  |
| No. of grains per panicle           | 58.37 ± 5.12 | 10.66 ± 2.62** | 10.43 ± 1.54** | 9.67 ± 2.17**  |
| Seed setting rate (%)               | 88.28 ± 1.75 | 20.53 ± 2.18** | 25.22 ± 2.53** | 28.10 ± 3.12** |

<sup>1</sup>The primary branch length represented the average length of all primary branches without the top branch. Values represent the means ± SD (*n* = 10). \*\*, *P* ≤ 0.01.

Table S4. Gene ontology enrichment analysis for part of differentially expressed genes involved in biological process

| GO ID      | GO term                                                   | Count in selection<br>(out of 521) | Count in total genome<br>(out of 10488) | Corrected <i>P</i> value |
|------------|-----------------------------------------------------------|------------------------------------|-----------------------------------------|--------------------------|
| GO:0009889 | Regulation of biosynthetic process                        | 95                                 | 1069                                    | 1.52E-06                 |
| GO:2000112 | Regulation of cellular macromolecule biosynthetic process | 95                                 | 1069                                    | 1.52E-06                 |
| GO:008009  | Regulation of primary metabolic process                   | 95                                 | 1095                                    | 2.68E-06                 |
| GO:000604  | Amino sugar metabolic process                             | 9                                  | 17                                      | 2.68E-06                 |
| GO:0031323 | Regulation of cellular metabolic process                  | 95                                 | 1100                                    | 2.90E-06                 |
| GO:0016998 | Cell wall macromolecule catabolic process                 | 9                                  | 18                                      | 4.68E-06                 |
| GO:0009607 | Response to biotic stimulus                               | 7                                  | 13                                      | 5.75E-05                 |
| GO:1901136 | Carbohydrate derivative catabolic process                 | 9                                  | 26                                      | 0.00015                  |
| GO:1901565 | Organonitrogen compound catabolic process                 | 10                                 | 37                                      | 0.00049                  |
| GO:0006950 | Response to stress                                        | 46                                 | 529                                     | 0.00630                  |
| GO:0006979 | Response to oxidative stress                              | 19                                 | 174                                     | 0.03893                  |

Sequencing and analysis of transcriptome of the samples were performed in by Illumina Hiseq XTen platform. After QC and mapping of reads to genome of *Oryza sativa.v7.0*, Salmon (0.8.2) was used to calculate reads count and TPM (Transcripts Per Million) of unigene. Differentially expressed genes was calculate based on reads count of each gene using package DEseq2. Significant differentially expressed genes were picked with the following criteria: corrected *P* value <0.05 and *foldchange value* >2. The topGO (v 2.24.0) was used for GO enrichment analysis.
